# Supplementary material for: Detection of left ventricular systolic dysfunction from single-lead electrocardiography adapted for portable and wearable devices
Source: PubMed Central journal article supplement (PMC10336107; doi:10.1038/s41746-023-00869-w), 2023-07-11

## ONLINE SUPPLEMENT

**Khunte A, Khera R, et al. Detection of Left Ventricular Systolic Dysfunction from Single-Lead Electrocardiography Adapted for Portable and Wearable Devices**

### TABLE OF CONTENTS

|                                                                                                                                       |          |
|---------------------------------------------------------------------------------------------------------------------------------------|----------|
| <b>SUPPLEMENTARY TABLES.....</b>                                                                                                      | <b>2</b> |
| <b>Supplementary Table 1: Patient-level baseline characteristics of study population.....</b>                                         | <b>2</b> |
| <b>Supplementary Table 2: Performance of noise-adapted and standard model on ECGs augmented with individual noise signatures.....</b> | <b>3</b> |
| <b>Supplementary Table 3: Performance of noise-adapted and standard model on ECGs augmented with multiple noise signatures.....</b>   | <b>4</b> |
| <b>SUPPLEMENTARY FIGURES.....</b>                                                                                                     | <b>5</b> |
| <b>Supplementary Figure 1: Flow chart of study cohort and analysis.....</b>                                                           | <b>5</b> |
| <b>Supplementary Figure 2: Model architecture used for model development.....</b>                                                     | <b>6</b> |

## SUPPLEMENTARY TABLES

**Table S1. Patient-level baseline characteristics of study population.** Data presented median [IQR] for age and number (percent) for other variables.

| Characteristic | Total (N = 116,210) |
|----------------|---------------------|
| Sex            |                     |
| Female         | 50,776 (43.7%)      |
| Male           | 53,271 (45.8%)      |
| Unknown        | 12,149 (10.5%)      |
| Age (years)    | 68 [56-78]          |
| Race           |                     |
| Hispanic       | 9,349 (8.0%)        |
| White          | 75,928 (65.3%)      |
| Black          | 14,000 (12.0%)      |
| Other          | 16,843 (14.5%)      |

**Table S2. Performance of noise-adapted and standard model on different noise types at each signal-to-noise ratio on the held-out test set.** Abbreviations: SNR, signal-to-noise ratio; PPV, positive predictive value; NPV, negative predictive value; AUROC, area under receiver operating characteristic curve; AUPRC, area under precision recall curve.

| Model            | Noise            | SNR          | PPV   | NPV   | Specificity | Sensitivity | AUROC (95% CI)      | AUPRC               |       |
|------------------|------------------|--------------|-------|-------|-------------|-------------|---------------------|---------------------|-------|
| Noise-Adapted    | None             | N/A          | 0.203 | 0.990 | 0.676       | 0.924       | 0.896 (0.886-0.905) | 0.455               |       |
|                  | Portable ECG     | 0.50         | 0.152 | 0.993 | 0.523       | 0.956       | 0.871 (0.861-0.882) | 0.392               |       |
|                  | Portable ECG     | 0.75         | 0.165 | 0.992 | 0.569       | 0.951       | 0.879 (0.868-0.889) | 0.411               |       |
|                  | Portable ECG     | 1.00         | 0.172 | 0.992 | 0.592       | 0.946       | 0.883 (0.872-0.893) | 0.421               |       |
|                  | Portable ECG     | 1.25         | 0.177 | 0.992 | 0.607       | 0.945       | 0.885 (0.875-0.895) | 0.428               |       |
|                  | Portable ECG     | 1.50         | 0.181 | 0.992 | 0.619       | 0.942       | 0.887 (0.877-0.897) | 0.433               |       |
|                  | Portable ECG     | 1.75         | 0.185 | 0.992 | 0.628       | 0.942       | 0.888 (0.878-0.898) | 0.436               |       |
|                  | Portable ECG     | 2.00         | 0.188 | 0.992 | 0.636       | 0.940       | 0.889 (0.880-0.899) | 0.439               |       |
|                  | Electrode Motion | 0.50         | 0.126 | 0.993 | 0.395       | 0.971       | 0.858 (0.846-0.869) | 0.361               |       |
|                  | Electrode Motion | 0.75         | 0.138 | 0.994 | 0.459       | 0.968       | 0.870 (0.859-0.881) | 0.388               |       |
|                  | Electrode Motion | 1.00         | 0.147 | 0.993 | 0.501       | 0.961       | 0.876 (0.865-0.886) | 0.402               |       |
|                  | Electrode Motion | 1.25         | 0.154 | 0.992 | 0.531       | 0.955       | 0.879 (0.869-0.889) | 0.410               |       |
|                  | Electrode Motion | 1.50         | 0.160 | 0.992 | 0.553       | 0.953       | 0.881 (0.871-0.892) | 0.416               |       |
|                  | Electrode Motion | 1.75         | 0.165 | 0.992 | 0.569       | 0.950       | 0.883 (0.873-0.893) | 0.422               |       |
|                  | Electrode Motion | 2.00         | 0.167 | 0.991 | 0.579       | 0.945       | 0.885 (0.875-0.895) | 0.426               |       |
|                  | Muscle Artifact  | 0.50         | 0.175 | 0.989 | 0.608       | 0.927       | 0.871 (0.861-0.882) | 0.389               |       |
|                  | Muscle Artifact  | 0.75         | 0.182 | 0.990 | 0.626       | 0.930       | 0.879 (0.869-0.890) | 0.415               |       |
|                  | Muscle Artifact  | 1.00         | 0.186 | 0.990 | 0.636       | 0.931       | 0.884 (0.873-0.894) | 0.429               |       |
|                  | Muscle Artifact  | 1.25         | 0.190 | 0.991 | 0.643       | 0.934       | 0.886 (0.877-0.896) | 0.437               |       |
|                  | Muscle Artifact  | 1.50         | 0.192 | 0.991 | 0.649       | 0.932       | 0.888 (0.879-0.898) | 0.444               |       |
|                  | Muscle Artifact  | 1.75         | 0.194 | 0.991 | 0.652       | 0.934       | 0.890 (0.880-0.899) | 0.448               |       |
|                  | Muscle Artifact  | 2.00         | 0.194 | 0.990 | 0.654       | 0.930       | 0.891 (0.881-0.900) | 0.449               |       |
|                  | Baseline Wander  | 0.50         | 0.186 | 0.990 | 0.634       | 0.932       | 0.883 (0.873-0.893) | 0.427               |       |
|                  | Baseline Wander  | 0.75         | 0.192 | 0.990 | 0.651       | 0.926       | 0.887 (0.877-0.897) | 0.440               |       |
|                  | Baseline Wander  | 1.00         | 0.195 | 0.990 | 0.658       | 0.926       | 0.889 (0.879-0.899) | 0.448               |       |
|                  | Baseline Wander  | 1.25         | 0.198 | 0.990 | 0.664       | 0.926       | 0.890 (0.881-0.900) | 0.453               |       |
|                  | Baseline Wander  | 1.50         | 0.199 | 0.990 | 0.666       | 0.928       | 0.891 (0.881-0.901) | 0.455               |       |
|                  | Baseline Wander  | 1.75         | 0.200 | 0.991 | 0.668       | 0.929       | 0.892 (0.882-0.902) | 0.457               |       |
|                  | Baseline Wander  | 2.00         | 0.201 | 0.991 | 0.669       | 0.929       | 0.892 (0.883-0.902) | 0.457               |       |
|                  | Standard         | None         | N/A   | 0.207 | 0.988       | 0.688       | 0.910               | 0.895 (0.884-0.905) | 0.475 |
|                  |                  | Portable ECG | 0.50  | 0.091 | 0.981       | 0.132       | 0.972               | 0.723 (0.706-0.739) | 0.200 |
|                  |                  | Portable ECG | 0.75  | 0.096 | 0.987       | 0.182       | 0.973               | 0.763 (0.748-0.779) | 0.242 |
| Portable ECG     |                  | 1.00         | 0.102 | 0.990 | 0.233       | 0.974       | 0.788 (0.773-0.802) | 0.270               |       |
| Portable ECG     |                  | 1.25         | 0.108 | 0.990 | 0.287       | 0.969       | 0.805 (0.791-0.819) | 0.291               |       |
| Portable ECG     |                  | 1.50         | 0.114 | 0.990 | 0.331       | 0.964       | 0.818 (0.805-0.831) | 0.306               |       |
| Portable ECG     |                  | 1.75         | 0.120 | 0.991 | 0.369       | 0.961       | 0.827 (0.814-0.840) | 0.318               |       |
| Portable ECG     |                  | 2.00         | 0.125 | 0.991 | 0.398       | 0.958       | 0.834 (0.822-0.847) | 0.329               |       |
| Electrode Motion |                  | 0.50         | 0.088 | 0.988 | 0.079       | 0.990       | 0.792 (0.779-0.806) | 0.239               |       |
| Electrode Motion |                  | 0.75         | 0.101 | 0.991 | 0.219       | 0.978       | 0.815 (0.802-0.829) | 0.264               |       |
| Electrode Motion |                  | 1.00         | 0.114 | 0.991 | 0.330       | 0.965       | 0.829 (0.817-0.842) | 0.285               |       |
| Electrode Motion |                  | 1.25         | 0.127 | 0.990 | 0.414       | 0.954       | 0.839 (0.827-0.851) | 0.301               |       |
| Electrode Motion |                  | 1.50         | 0.137 | 0.989 | 0.468       | 0.942       | 0.846 (0.834-0.858) | 0.313               |       |
| Electrode Motion |                  | 1.75         | 0.145 | 0.989 | 0.508       | 0.934       | 0.851 (0.839-0.862) | 0.324               |       |
| Electrode Motion |                  | 2.00         | 0.152 | 0.988 | 0.537       | 0.925       | 0.855 (0.843-0.866) | 0.333               |       |
| Muscle Artifact  |                  | 0.50         | 0.100 | 0.991 | 0.210       | 0.979       | 0.807 (0.795-0.820) | 0.245               |       |
| Muscle Artifact  |                  | 0.75         | 0.124 | 0.993 | 0.385       | 0.970       | 0.832 (0.820-0.844) | 0.274               |       |
| Muscle Artifact  |                  | 1.00         | 0.143 | 0.991 | 0.488       | 0.951       | 0.844 (0.833-0.855) | 0.294               |       |
| Muscle Artifact  |                  | 1.25         | 0.157 | 0.990 | 0.546       | 0.940       | 0.851 (0.840-0.863) | 0.310               |       |
| Muscle Artifact  |                  | 1.50         | 0.166 | 0.989 | 0.584       | 0.929       | 0.857 (0.846-0.868) | 0.323               |       |
| Muscle Artifact  |                  | 1.75         | 0.175 | 0.989 | 0.612       | 0.923       | 0.861 (0.850-0.872) | 0.335               |       |
| Muscle Artifact  |                  | 2.00         | 0.181 | 0.988 | 0.631       | 0.912       | 0.864 (0.853-0.875) | 0.344               |       |
| Baseline Wander  |                  | 0.50         | 0.095 | 0.993 | 0.158       | 0.987       | 0.802 (0.789-0.816) | 0.236               |       |
| Baseline Wander  |                  | 0.75         | 0.113 | 0.990 | 0.324       | 0.964       | 0.822 (0.810-0.835) | 0.260               |       |
| Baseline Wander  |                  | 1.00         | 0.130 | 0.989 | 0.433       | 0.946       | 0.833 (0.821-0.846) | 0.277               |       |
| Baseline Wander  |                  | 1.25         | 0.144 | 0.988 | 0.503       | 0.933       | 0.841 (0.829-0.853) | 0.292               |       |
| Baseline Wander  |                  | 1.50         | 0.154 | 0.987 | 0.546       | 0.923       | 0.847 (0.835-0.859) | 0.303               |       |
| Baseline Wander  |                  | 1.75         | 0.163 | 0.988 | 0.578       | 0.918       | 0.851 (0.840-0.863) | 0.314               |       |
| Baseline Wander  |                  | 2.00         | 0.169 | 0.986 | 0.599       | 0.908       | 0.855 (0.843-0.866) | 0.322               |       |

**Table S3. Performance of noise-adapted and standard model on ECGs augmented with multiple noise types simultaneously at each signal-to-noise ratio on the held-out test set.** Abbreviations: SNR, signal-to-noise ratio; PPV, positive predictive value; NPV, negative predictive value; AUROC, area under receiver operating characteristic curve; AUPRC, area under precision recall curve.

| Model                          | Noise                           | SNR   | PPV   | NPV   | Specificity | Sensitivity         | AUROC (95% CI)      | AUPRC |
|--------------------------------|---------------------------------|-------|-------|-------|-------------|---------------------|---------------------|-------|
| Noise-Adapted                  | Portable ECG + Electrode Motion | 0.500 | 0.994 | 0.437 | 0.969       | 0.856               | 0.856 (0.845-0.867) | 0.345 |
|                                | Portable ECG + Electrode Motion | 0.750 | 0.993 | 0.518 | 0.960       | 0.869               | 0.869 (0.859-0.880) | 0.375 |
|                                | Portable ECG + Electrode Motion | 1.000 | 0.992 | 0.557 | 0.953       | 0.876               | 0.876 (0.865-0.886) | 0.391 |
|                                | Portable ECG + Electrode Motion | 1.250 | 0.992 | 0.581 | 0.947       | 0.879               | 0.879 (0.869-0.889) | 0.399 |
|                                | Portable ECG + Electrode Motion | 1.500 | 0.991 | 0.597 | 0.941       | 0.881               | 0.881 (0.871-0.891) | 0.406 |
|                                | Portable ECG + Electrode Motion | 1.750 | 0.991 | 0.612 | 0.941       | 0.883               | 0.883 (0.873-0.893) | 0.412 |
|                                | Portable ECG + Electrode Motion | 2.000 | 0.991 | 0.622 | 0.939       | 0.885               | 0.885 (0.875-0.895) | 0.416 |
|                                | Portable ECG + Muscle Artifact  | 0.500 | 0.990 | 0.568 | 0.937       | 0.872               | 0.872 (0.861-0.882) | 0.386 |
|                                | Portable ECG + Muscle Artifact  | 0.750 | 0.991 | 0.611 | 0.935       | 0.880               | 0.880 (0.869-0.890) | 0.407 |
|                                | Portable ECG + Muscle Artifact  | 1.000 | 0.990 | 0.633 | 0.930       | 0.884               | 0.884 (0.874-0.894) | 0.418 |
|                                | Portable ECG + Muscle Artifact  | 1.250 | 0.990 | 0.649 | 0.927       | 0.886               | 0.886 (0.876-0.896) | 0.425 |
|                                | Portable ECG + Muscle Artifact  | 1.500 | 0.990 | 0.659 | 0.926       | 0.888               | 0.888 (0.878-0.897) | 0.430 |
|                                | Portable ECG + Muscle Artifact  | 1.750 | 0.990 | 0.666 | 0.924       | 0.889               | 0.889 (0.879-0.899) | 0.434 |
|                                | Portable ECG + Muscle Artifact  | 2.000 | 0.990 | 0.672 | 0.923       | 0.890               | 0.890 (0.880-0.899) | 0.437 |
|                                | Portable ECG + Baseline Wander  | 0.500 | 0.993 | 0.560 | 0.956       | 0.880               | 0.880 (0.869-0.890) | 0.402 |
|                                | Portable ECG + Baseline Wander  | 0.750 | 0.992 | 0.607 | 0.943       | 0.885               | 0.885 (0.876-0.895) | 0.419 |
|                                | Portable ECG + Baseline Wander  | 1.000 | 0.992 | 0.630 | 0.942       | 0.888               | 0.888 (0.879-0.898) | 0.427 |
|                                | Portable ECG + Baseline Wander  | 1.250 | 0.991 | 0.645 | 0.934       | 0.890               | 0.890 (0.880-0.899) | 0.432 |
|                                | Portable ECG + Baseline Wander  | 1.500 | 0.991 | 0.656 | 0.930       | 0.891               | 0.891 (0.881-0.901) | 0.437 |
|                                | Portable ECG + Baseline Wander  | 1.750 | 0.990 | 0.663 | 0.925       | 0.892               | 0.892 (0.882-0.901) | 0.440 |
| Portable ECG + Baseline Wander | 2.000                           | 0.990 | 0.668 | 0.924 | 0.892       | 0.892 (0.882-0.902) | 0.443               |       |
| Standard                       | Portable ECG + Electrode Motion | 0.500 | 0.094 | 0.994 | 0.150       | 0.991               | 0.774 (0.760-0.788) | 0.226 |
|                                | Portable ECG + Electrode Motion | 0.750 | 0.108 | 0.993 | 0.278       | 0.978               | 0.806 (0.793-0.819) | 0.257 |
|                                | Portable ECG + Electrode Motion | 1.000 | 0.121 | 0.991 | 0.370       | 0.964               | 0.822 (0.810-0.835) | 0.278 |
|                                | Portable ECG + Electrode Motion | 1.250 | 0.131 | 0.990 | 0.434       | 0.951               | 0.832 (0.820-0.844) | 0.293 |
|                                | Portable ECG + Electrode Motion | 1.500 | 0.142 | 0.991 | 0.484       | 0.951               | 0.840 (0.828-0.852) | 0.306 |
|                                | Portable ECG + Electrode Motion | 1.750 | 0.149 | 0.991 | 0.518       | 0.946               | 0.846 (0.834-0.857) | 0.318 |
|                                | Portable ECG + Electrode Motion | 2.000 | 0.155 | 0.990 | 0.542       | 0.939               | 0.850 (0.839-0.862) | 0.327 |
|                                | Portable ECG + Muscle Artifact  | 0.500 | 0.093 | 0.991 | 0.141       | 0.985               | 0.773 (0.758-0.787) | 0.234 |
|                                | Portable ECG + Muscle Artifact  | 0.750 | 0.109 | 0.992 | 0.288       | 0.973               | 0.808 (0.795-0.821) | 0.267 |
|                                | Portable ECG + Muscle Artifact  | 1.000 | 0.124 | 0.991 | 0.394       | 0.959               | 0.827 (0.814-0.839) | 0.287 |
|                                | Portable ECG + Muscle Artifact  | 1.250 | 0.137 | 0.991 | 0.464       | 0.952               | 0.838 (0.826-0.850) | 0.302 |
|                                | Portable ECG + Muscle Artifact  | 1.500 | 0.149 | 0.991 | 0.513       | 0.949               | 0.845 (0.833-0.857) | 0.315 |
|                                | Portable ECG + Muscle Artifact  | 1.750 | 0.157 | 0.991 | 0.547       | 0.943               | 0.850 (0.838-0.861) | 0.324 |
|                                | Portable ECG + Muscle Artifact  | 2.000 | 0.164 | 0.990 | 0.573       | 0.935               | 0.854 (0.843-0.866) | 0.331 |
|                                | Portable ECG + Baseline Wander  | 0.500 | 0.096 | 0.992 | 0.171       | 0.984               | 0.783 (0.770-0.797) | 0.218 |
|                                | Portable ECG + Baseline Wander  | 0.750 | 0.119 | 0.994 | 0.351       | 0.975               | 0.816 (0.804-0.829) | 0.254 |
|                                | Portable ECG + Baseline Wander  | 1.000 | 0.136 | 0.992 | 0.455       | 0.960               | 0.832 (0.820-0.844) | 0.277 |
|                                | Portable ECG + Baseline Wander  | 1.250 | 0.150 | 0.991 | 0.519       | 0.947               | 0.842 (0.831-0.854) | 0.293 |
|                                | Portable ECG + Baseline Wander  | 1.500 | 0.159 | 0.990 | 0.557       | 0.935               | 0.849 (0.838-0.860) | 0.305 |
|                                | Portable ECG + Baseline Wander  | 1.750 | 0.167 | 0.990 | 0.585       | 0.931               | 0.854 (0.843-0.865) | 0.315 |
| Portable ECG + Baseline Wander | 2.000                           | 0.174 | 0.989 | 0.605 | 0.928       | 0.858 (0.847-0.869) | 0.325               |       |

## SUPPLEMENTARY FIGURES

**Figure S1. Flow chart of study cohort and analysis.** Abbreviations: ECG, electrocardiogram; TTE, transthoracic echocardiogram.

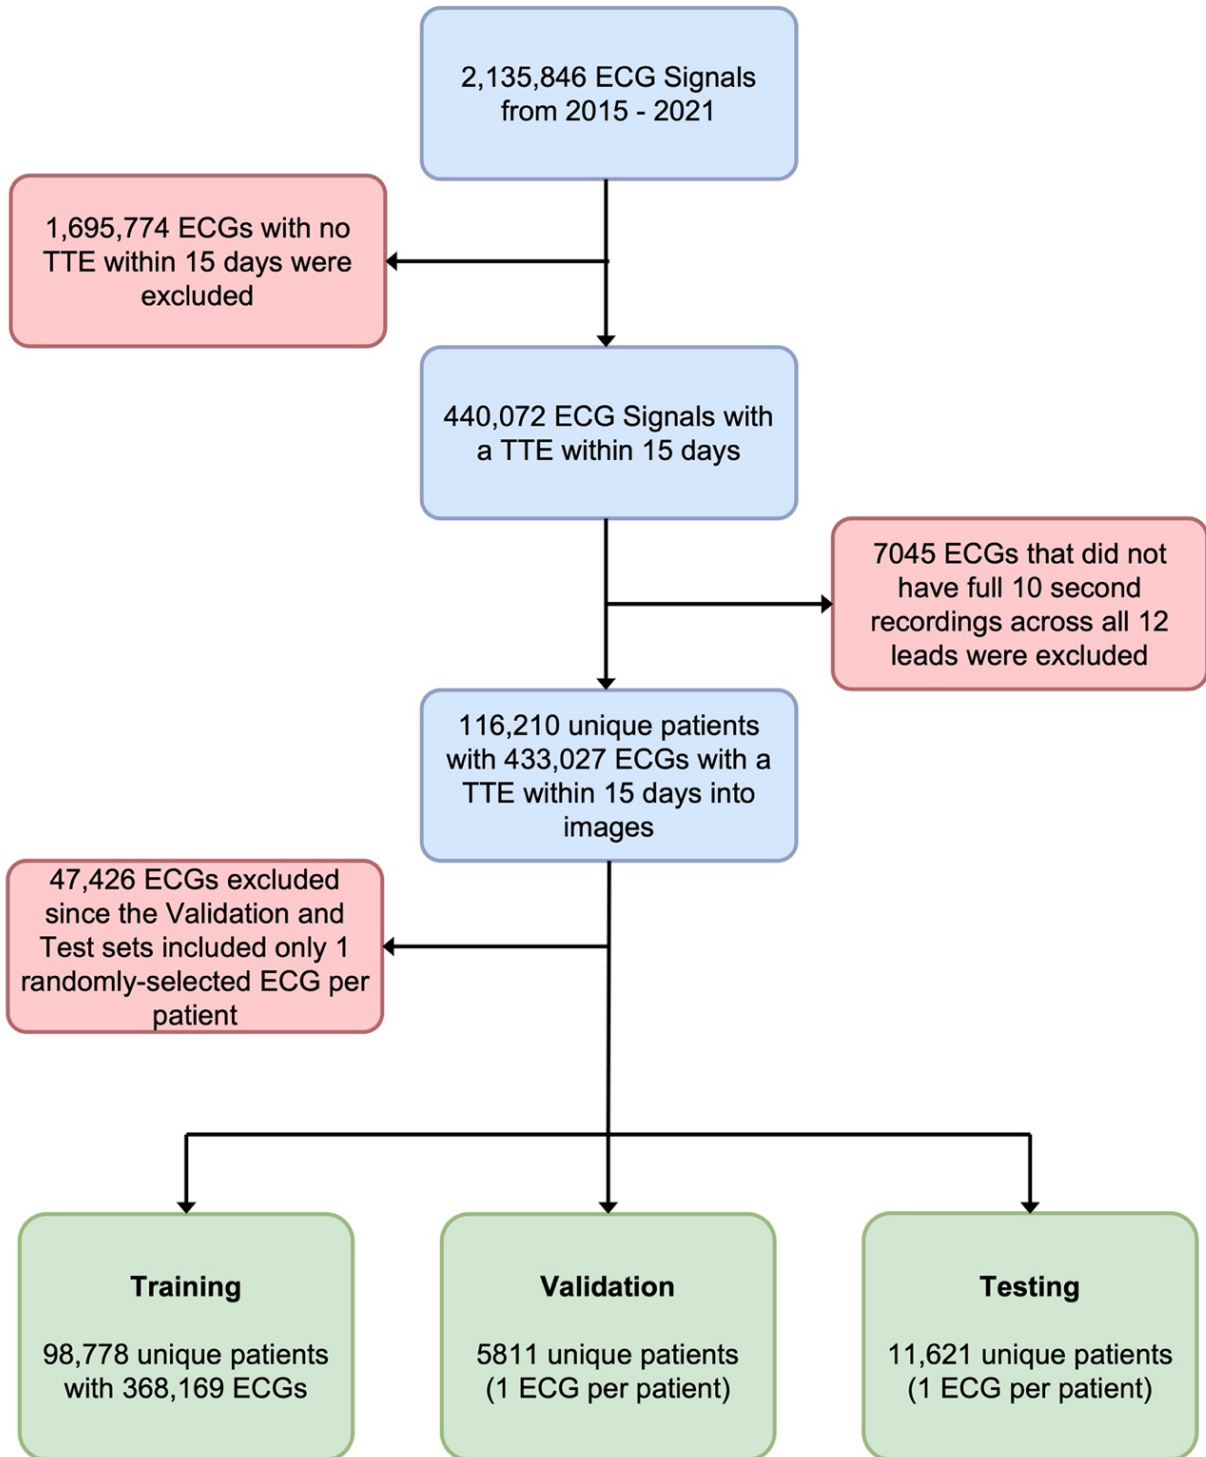

**Figure S2. Model architecture used for model development.** Abbreviations: ECG, electrocardiogram.

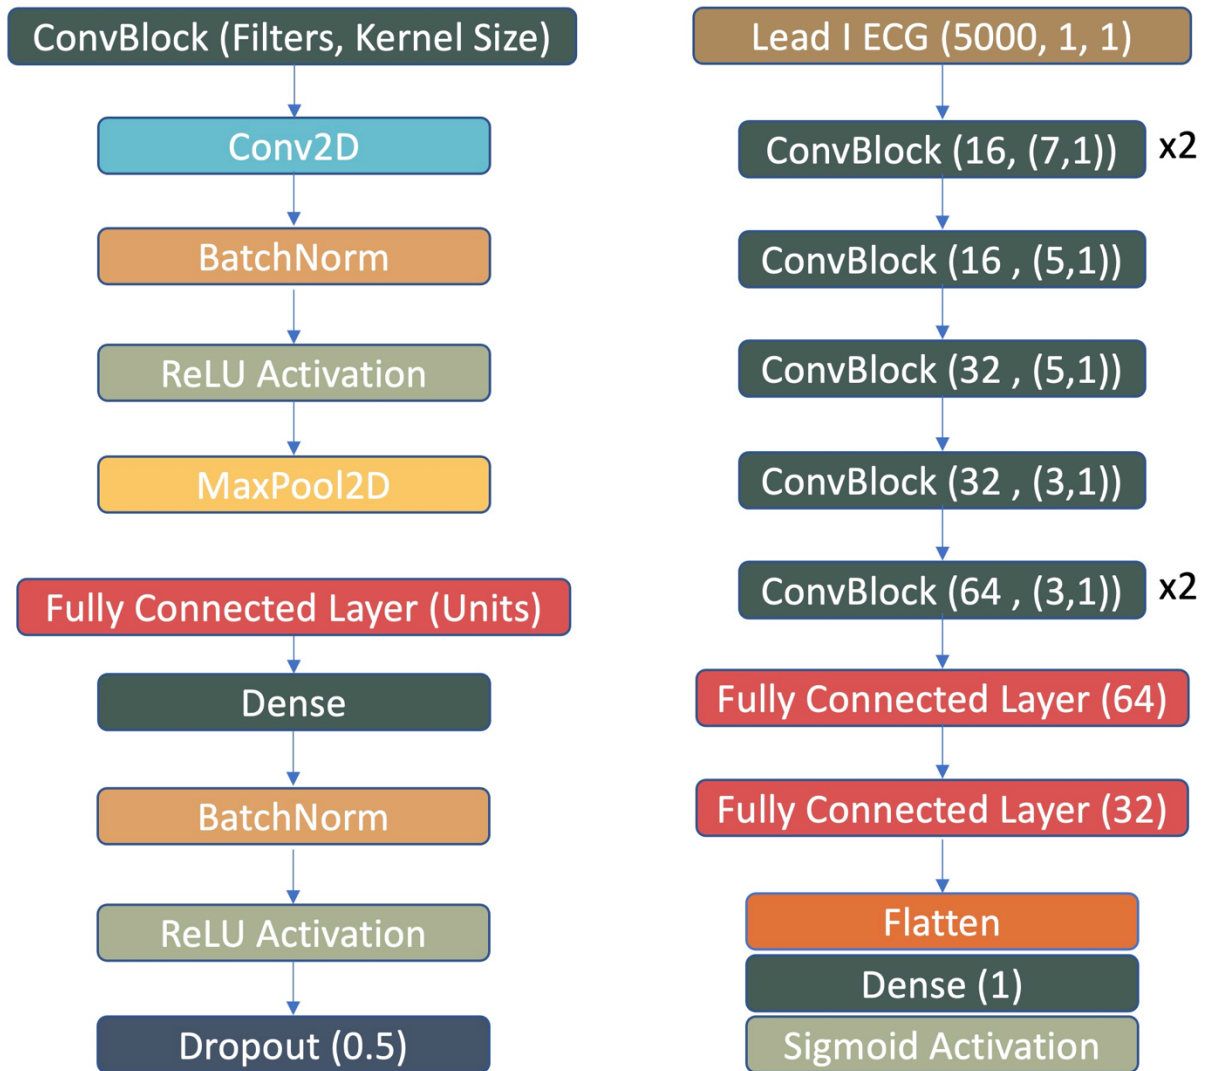

Supplement: 41746_2023_869_MOESM1_ESM.pdf [file 41746_2023_869_MOESM1_ESM.pdf]
